# Supplementary material for: LC-HRMS Profiling and Antidiabetic, Anticholinergic, and Antioxidant Activities of Aerial Parts of Kınkor (Ferulago stellata)
Source: MDPI journal article supplement (doi:10.3390/molecules26092469), 2021-04-23
Supplement: s1 [file s1]

## Supporting Information

# LC-HRMS Profiling, Antidiabetic, Anticholinergic and Antioxidant Activities of Aerial Parts of Kınkor (*Ferulago stellata*)

Hatice Kızıldaş <sup>1</sup>, Zeynebe Bingöl <sup>2,3</sup>, Ahmet Ceyhan Gören <sup>4,5</sup>, Leyla Polat Kose <sup>6</sup>, Lokman Durmaz <sup>7</sup>, Fevzi Topal <sup>8</sup>, Saleh H. Alwasel <sup>9</sup> and İlhami Gulcin <sup>2</sup>

<sup>1</sup> Department of Pharmacy Services, Vocational School of Health Services, Van Yuzuncu Yıl University, 65080-Van, Turkey

<sup>2</sup> Department of Chemistry, Faculty of Science, Ataturk University, Erzurum, Turkey

<sup>3</sup> Department of Medical Services and Techniques, Tokat Vocational School of Health Services, Gazi-osmanpasa University, 60250-Tokat, Turkey

<sup>4</sup> Department of Analytical Chemistry, Faculty of Pharmacy, Bezmialem Vakif University, 34093-Istanbul, Turkey

<sup>5</sup> Drug Application and Research Center, Bezmialem Vakif University, 34093-Istanbul, Turkey

<sup>6</sup> Department of Pharmacy Services, Vocational School, Beykent University, 34500-Buyukcekmece, Istanbul, Turkey

<sup>7</sup> Department of Medical Services and Technology, Cayirli Vocational School, Erzincan Binali Yildirim University, 24500-Cayirli, Erzincan, Turkey

<sup>8</sup> Department of Chemical and Chemical Processing Technologies, Gumushane Vocational School, Gumushane University, 29000-Gumushane, Turkey

<sup>9</sup> Department of Zoology, College of Science, King Saud University, 11451-Riyadh, Saudi Arabia

C:\Xcalibur\...\EEFS

02/19/21 17:38:19

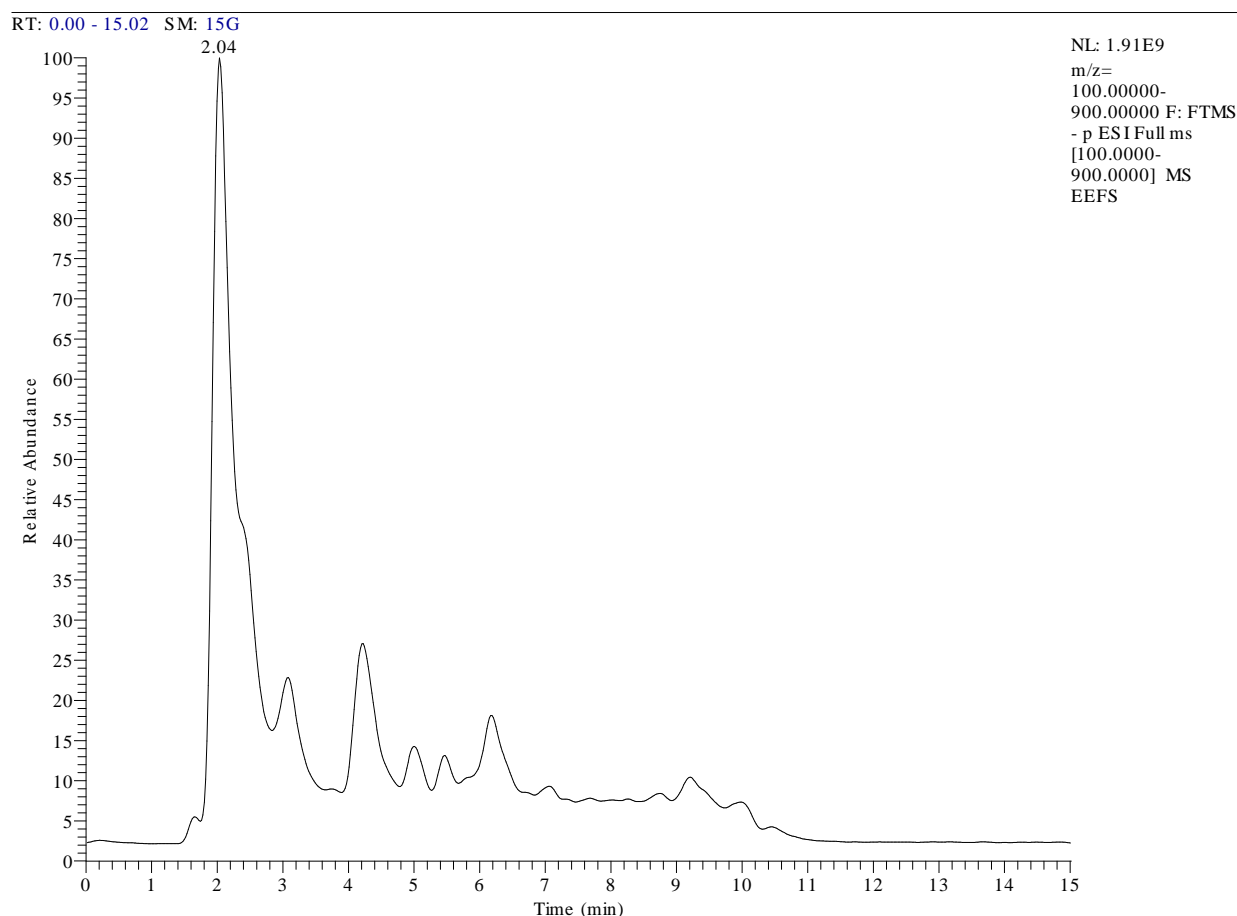

Figure S1. TIC chromatogram of EESF in negative ionization mode.

RT: 0.00 - 15.02 SM: 15G

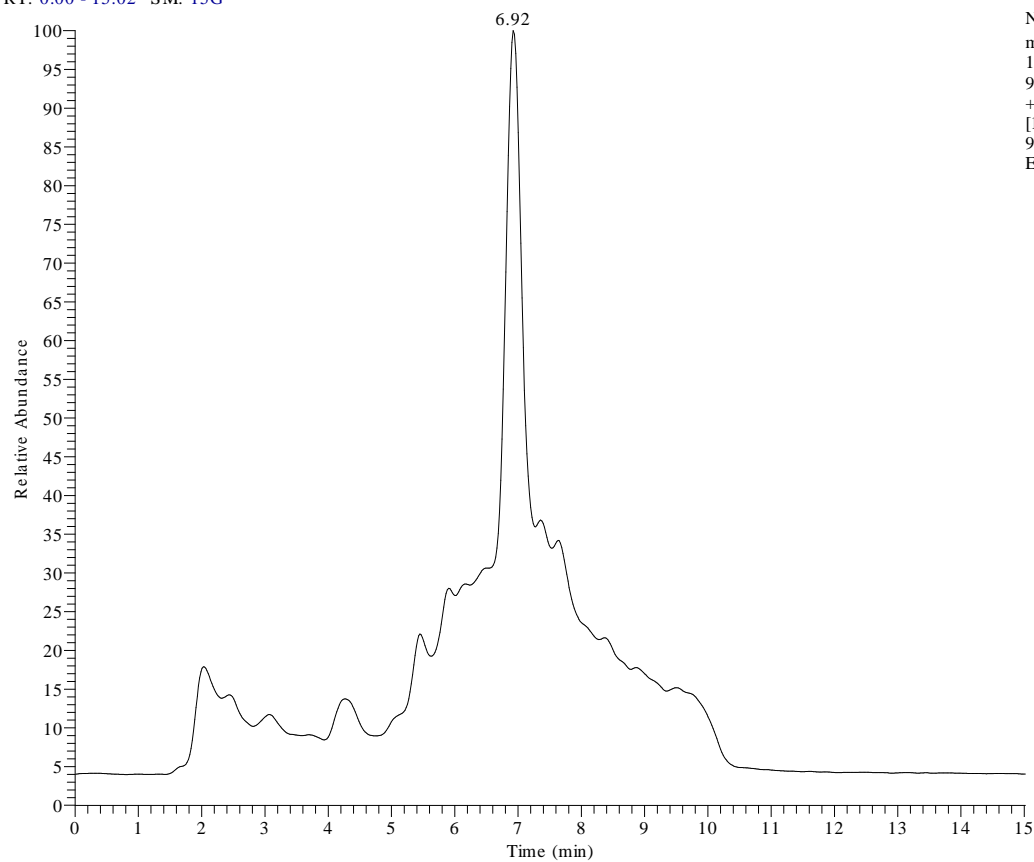

NL: 1.26E10  
m/z=  
100.00000-  
900.00000 F: FTMS  
+ p ESI Full ms  
[100.0000-  
900.0000] MS  
EEFS

**Figure S2.** TIC chromatogram of EESF in positive ionization mode.

RT: 0.00 - 15.01 SM: 15G

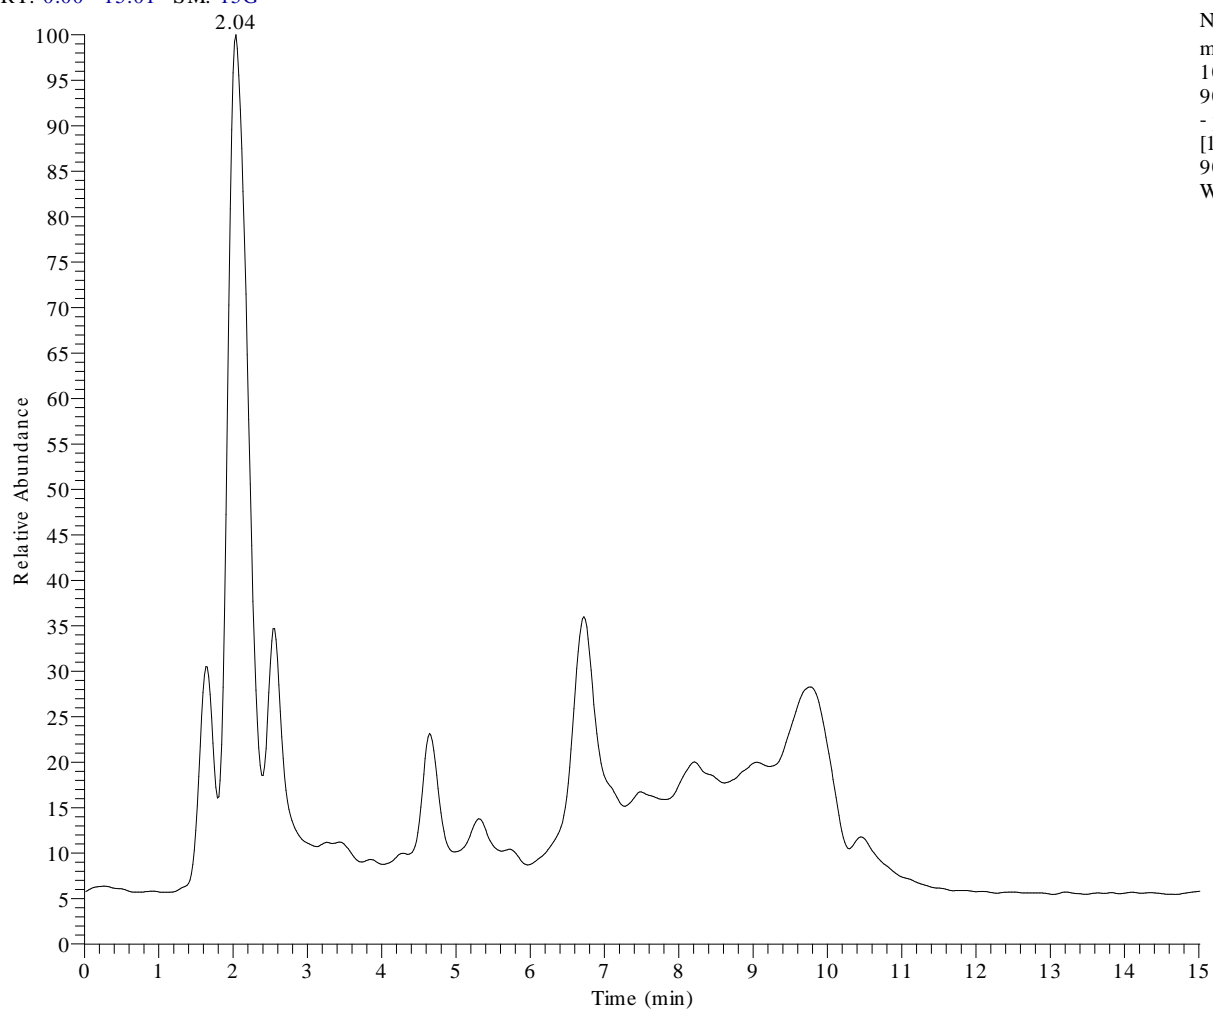

NL: 3.14E9  
m/z=  
100.00000-  
900.00000 F: FTMS  
- p ESI Full ms  
[100.0000-  
900.0000] MS  
WEFS

**Figure S3.** TIC chromatogram of WESF in negative ionization mode.

RT: 0.00 - 15.01 SM: 15G

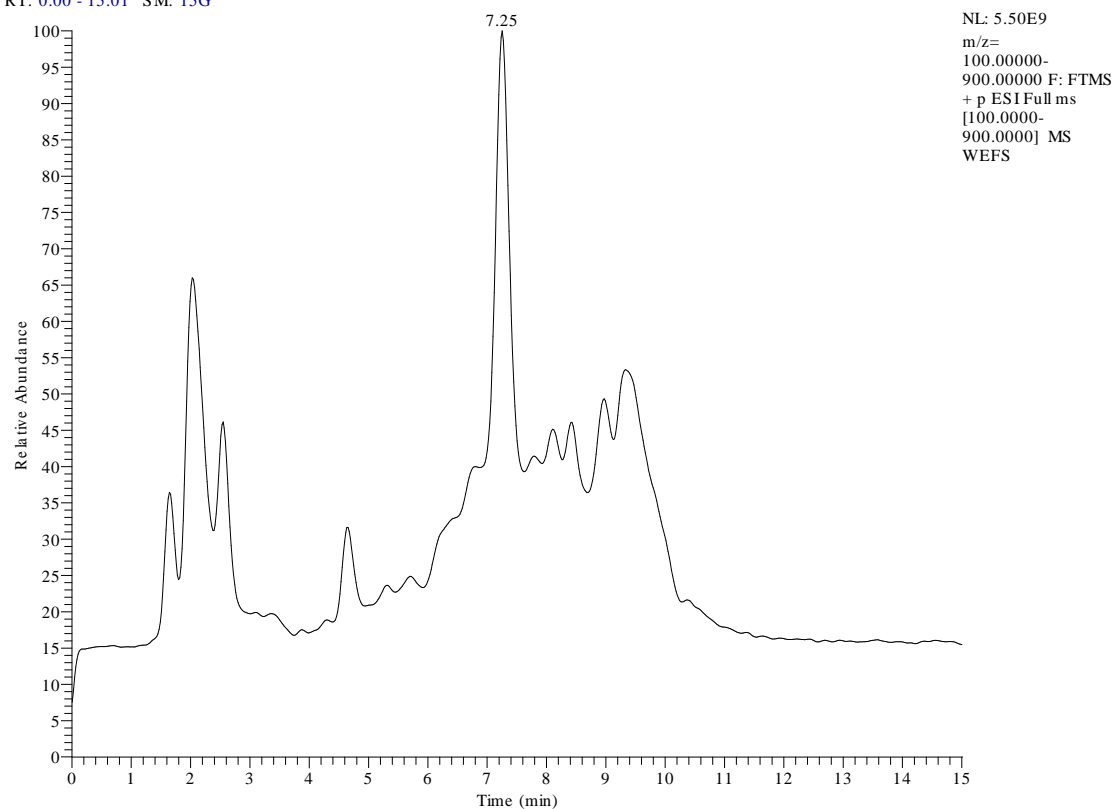

**Figure S4.** TIC chromatogram of WESF in positive ionization mode.
